# Supplementary material
Source: PubMed Central journal article supplement (PMC1639520)
Supplement: rspb20063678s13.pdf [file rspb20063678s13.pdf]

Supplement 1. Study populations of *B. boreas* and their sample sizes ( $N$ ), average observed heterozygosity ( $H_o$ ), average expected heterozygosity ( $H_e$ ) and average number of alleles per locus ( $N_a$ ).

| Population | $N$ | $H_o$ | $H_e$ | $N_a$ |
|------------|-----|-------|-------|-------|
| BLW        | 18  | 0.66  | 0.79  | 8     |
| MOS        | 24  | 0.65  | 0.74  | 9     |
| PIK        | 32  | 0.72  | 0.76  | 9     |
| RON        | 28  | 0.63  | 0.73  | 8     |
| STF        | 15  | 0.67  | 0.80  | 7     |
| UGV        | 33  | 0.70  | 0.77  | 10    |

Supplement 2. Pairwise  $F_{ST}$  values for *B. boreas* populations below the diagonal. Associated  $P$ -values above the diagonal, obtained after 3000 permutations. Bold values are significant at the 0.0033 level after sequential Bonferroni correction.

|     | BLW          | UGV          | MOS          | PIK   | RON   | STF   |
|-----|--------------|--------------|--------------|-------|-------|-------|
| BLW |              | 0.153        | 0.571        | 0.002 | 0.002 | 0.159 |
| UGV | 0.007        |              | 0.013        | 0.000 | 0.000 | 0.037 |
| MOS | -0.003       | 0.018        |              | 0.001 | 0.014 | 0.262 |
| PIK | <b>0.028</b> | <b>0.054</b> | <b>0.033</b> |       | 0.297 | 0.317 |
| RON | <b>0.039</b> | <b>0.037</b> | 0.022        | 0.002 |       | 0.022 |
| STF | 0.013        | 0.018        | 0.006        | 0.004 | 0.024 |       |

Supplement 3. Genetic distance ( $F_{ST}/(1-F_{ST})$ ) as a function of log geographic distance for *B. boreas*.

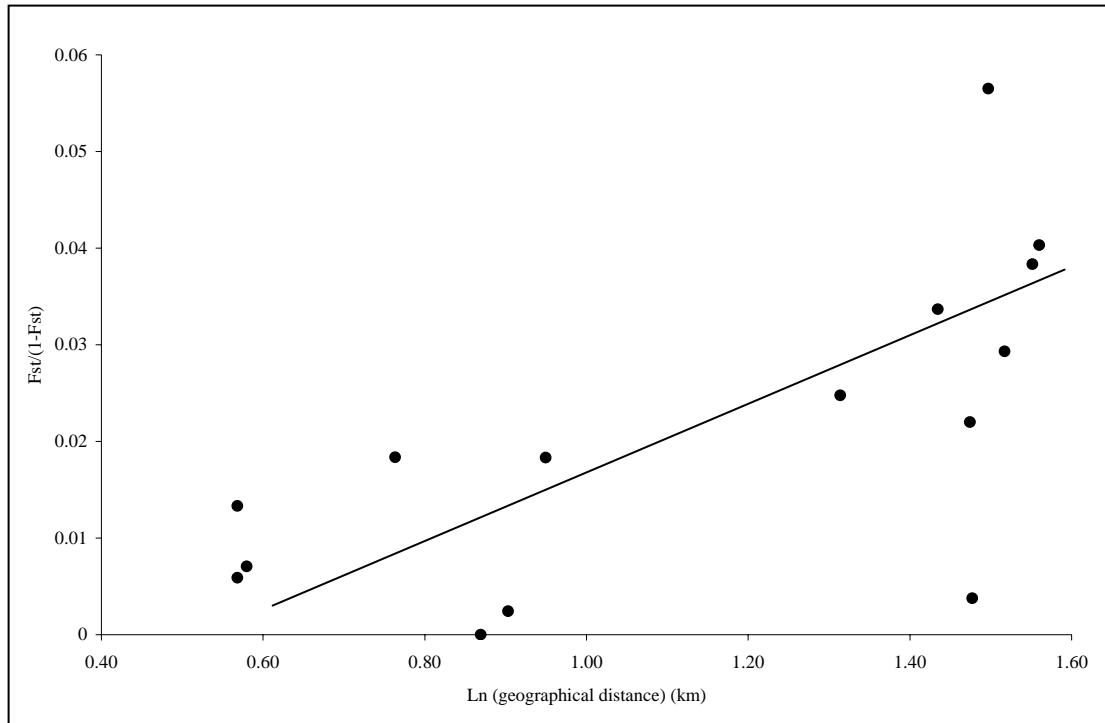

Supplement 4. Estimates of  $4N_e m$  ( $M$ ) and  $4N_e \mu$  ( $\Theta$ ) for *B. boreas*. Gene flow occurs in the direction from populations at top to populations at side.  $\Theta$  is shown on the diagonal (in bold), and  $M$  is off-diagonal elements. U95CI shows upper 95% confidence limit, and L95CI shows lower 95% confidence limit.

|       | BLW          | UGV          | MOS          | PIK          | RON          | STF          |
|-------|--------------|--------------|--------------|--------------|--------------|--------------|
| BLW   | <b>0.395</b> | 7.336        | 5.004        | 3.515        | 2.646        | 3.008        |
| U95CI | <b>0.356</b> | 6.631        | 4.415        | 3.030        | 2.221        | 2.559        |
| L95CI | <b>0.440</b> | 8.102        | 5.634        | 4.053        | 3.120        | 3.520        |
| UGV   | 2.695        | <b>0.706</b> | 4.452        | 3.750        | 4.269        | 2.281        |
| U95CI | 2.361        | <b>0.665</b> | 4.033        | 3.356        | 3.851        | 1.983        |
| L95CI | 3.054        | <b>0.750</b> | 4.897        | 4.164        | 4.716        | 2.605        |
| MOS   | 1.907        | 4.588        | <b>0.477</b> | 2.753        | 4.355        | 2.032        |
| U95CI | 1.628        | 4.147        | <b>0.445</b> | 2.417        | 3.939        | 1.749        |
| L95CI | 2.210        | 5.054        | <b>0.513</b> | 3.117        | 4.798        | 2.343        |
| PIK   | 1.290        | 3.212        | 2.815        | <b>0.623</b> | 3.791        | 0.722        |
| U95CI | 1.081        | 2.879        | 2.496        | <b>0.588</b> | 3.427        | 0.570        |
| L95CI | 1.523        | 3.570        | 3.158        | <b>0.661</b> | 4.183        | 0.898        |
| RON   | 1.699        | 3.379        | 2.896        | 4.249        | <b>0.475</b> | 1.740        |
| U95CI | 1.463        | 3.039        | 2.581        | 3.854        | <b>0.445</b> | 1.500        |
| L95CI | 1.961        | 3.745        | 3.234        | 4.665        | <b>0.507</b> | 2.002        |
| STF   | 2.837        | 2.203        | 2.495        | 1.739        | 3.826        | <b>0.306</b> |
| U95CI | 2.456        | 1.868        | 2.131        | 1.444        | 3.385        | <b>0.277</b> |
| L95CI | 3.257        | 2.578        | 2.974        | 2.073        | 4.307        | <b>0.339</b> |
